# Supplementary material
Source: publisher site journal article supplement (https://www.degruyterbrill.com/publication/isbn/9783486592948/downloadAsset/9783486592948_Buchinformation.pdf)
Supplement: Supplementary file 1 [file 9783486592948_Buchinformation.pdf]

## Neue Impulse für den Allfinanzmarkt

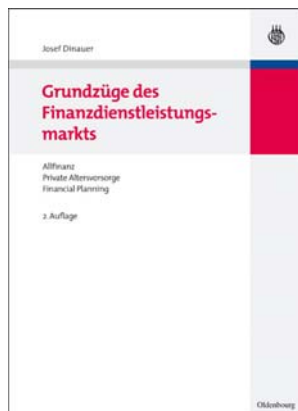

Josef Dinauer

### Grundzüge des Finanzdienstleistungsmarkts Allfinanz – Private Altersvorsorge – Financial Planning

2., vollständig überarbeitete und aktualisierte Auflage 2008  
233 Seiten | broschiert | 32,80 €  
ISBN 978-3-486-58453-0

Warum beraten Banken in Versicherungsfragen? Warum verkaufen Bausparkassen Investmentfonds? Was sind die Motive, die hinter diesen Strategien stecken? Und welche Auswirkungen hat dies auf den Markt der Privaten Altersvorsorge und dem Financial Planning? Diesen Fragen geht die zweite Auflage des Allfinanz-Lehrbuchs in ergänzter, erweiterter und aktualisierter Form nach.

---

Das Lehrbuch wendet sich sowohl an Studenten von Universitäten, Hochschulen und Berufsakademien als auch an Praktiker im Finanzdienstleistungsmarkt wie Kundenberater, Vertreter, Makler und Schulungsspezialisten.

---

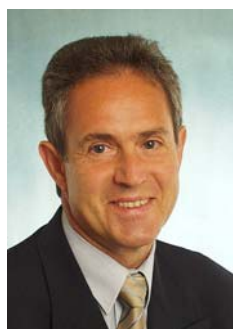

Prof. Dr. Josef Dinauer ist Lehrstuhlinhaber für Bank-, Finanz- und Versicherungswirtschaft an der Hochschule München.

[www.oldenbourg.de](http://www.oldenbourg.de)

Pressereferat Wirtschafts- und Sozialwissenschaften – Mareike Kuttig  
Oldenbourg Wissenschaftsverlag | Rosenheimer Str. 145 | 81679 München  
Tel.: +49 89 45051-467 | Fax: +49 89 45051-292 | [kuttig@oldenbourg.de](mailto:kuttig@oldenbourg.de)

Alle Veröffentlichungen des Oldenbourg Verlags sind über den Buchhandel zu beziehen.  
Bei Lieferung fallen Versandgebühren an. Rezensionsexemplare auf Anforderung.
